# Supplementary material
Source: PubMed Central journal article supplement (PMC4334693)
Supplement: NIHMS645087-supplement-000650_-_Supplemental_Material.pdf [file NIHMS645087-supplement-000650_-_Supplemental_Material.pdf]

# Supplementary Material

## Primers for Sanger Sequencing

### *ADRA2B*

Forward: 5' - GGTGCGCTTGGAGTTGTA CT - 3'  
Reverse: 5' - GACCACCAGGACCCCTACTC - 3'

### *SCN1A*

Forward 5' - TGTGCCATGCTGGTGTATTT - 3'  
Reverse 5' - GCTGCGAGTTTTCAAGTTGG - 3'

### *SLC9A1*

Forward 5' - TGTCTCCCCTGGAAAATGAG - 3'  
Reverse 5' - TCCTGGACAACCTGCTCTTC - 3'

### *ATP2B3*

Forward 5' - AGGGGTCTCAGGACTCTGGT - 3'  
Reverse 5' - AGATGGGGTTGCTGAAGATG - 3'

### *CHRN4*

Forward 5' - CTGGTGACGATGGAGAAGGT - 3'  
Reverse 5' - AGTTCCGCTCCTGGACCTAT - 3'

**Supplemental Figure 1: Number of Mapped Bases Per Sample**

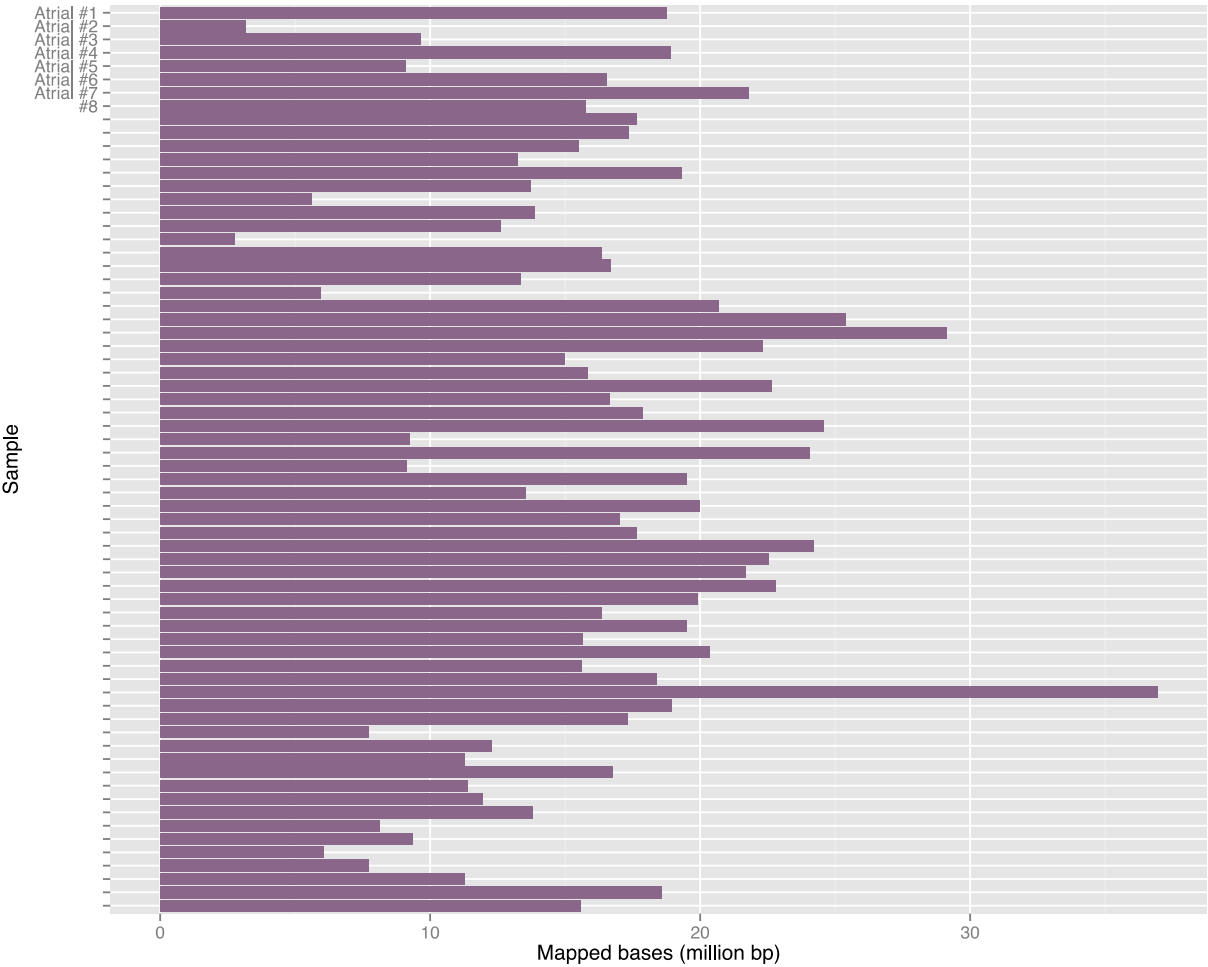

**Supplemental Figure 2: Number of Callable Bases Per Sample**

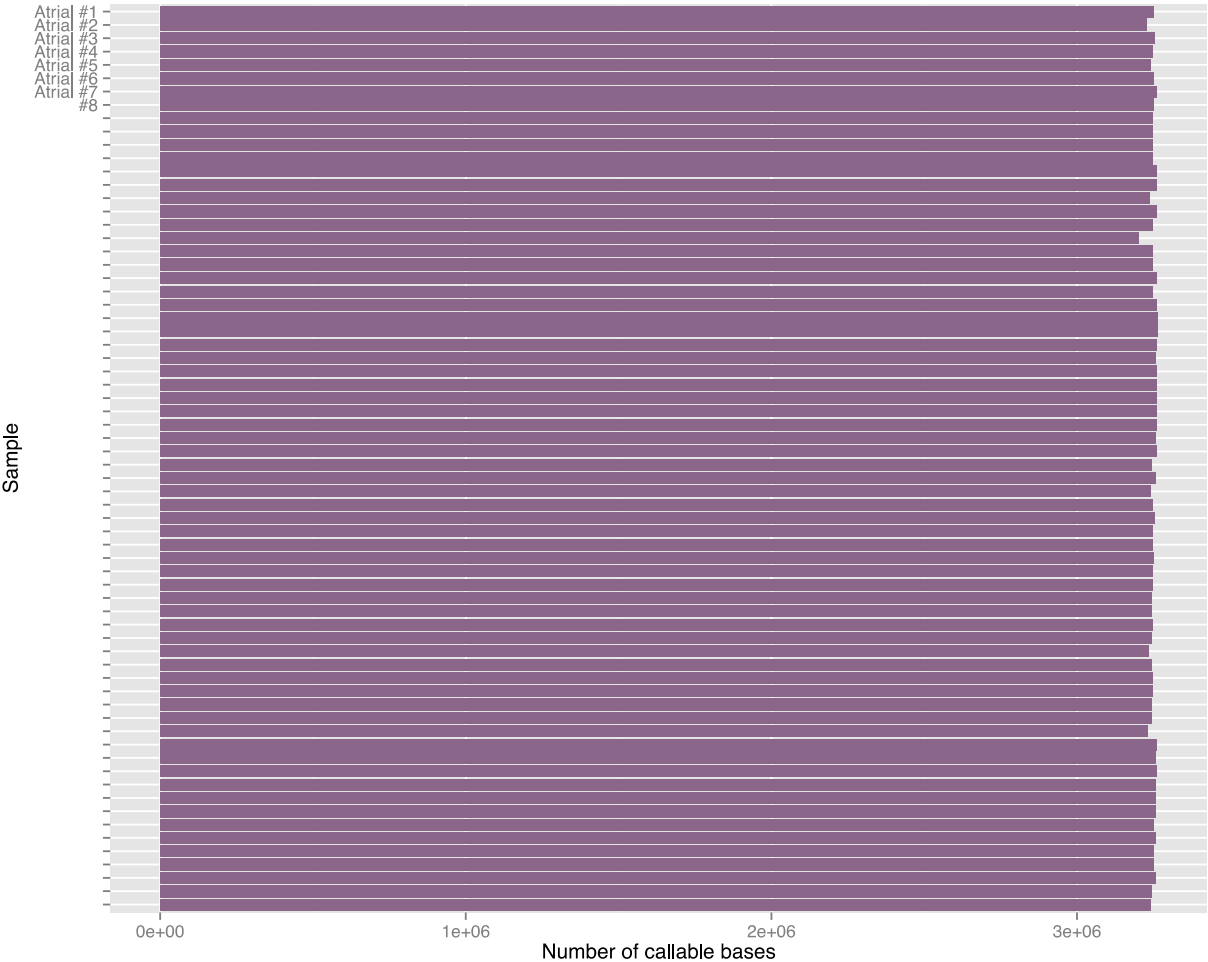

**Supplemental Figure 3: Genes Containing Isolated Base Pair Regions with Inadequate Coverage for Variant Calling**

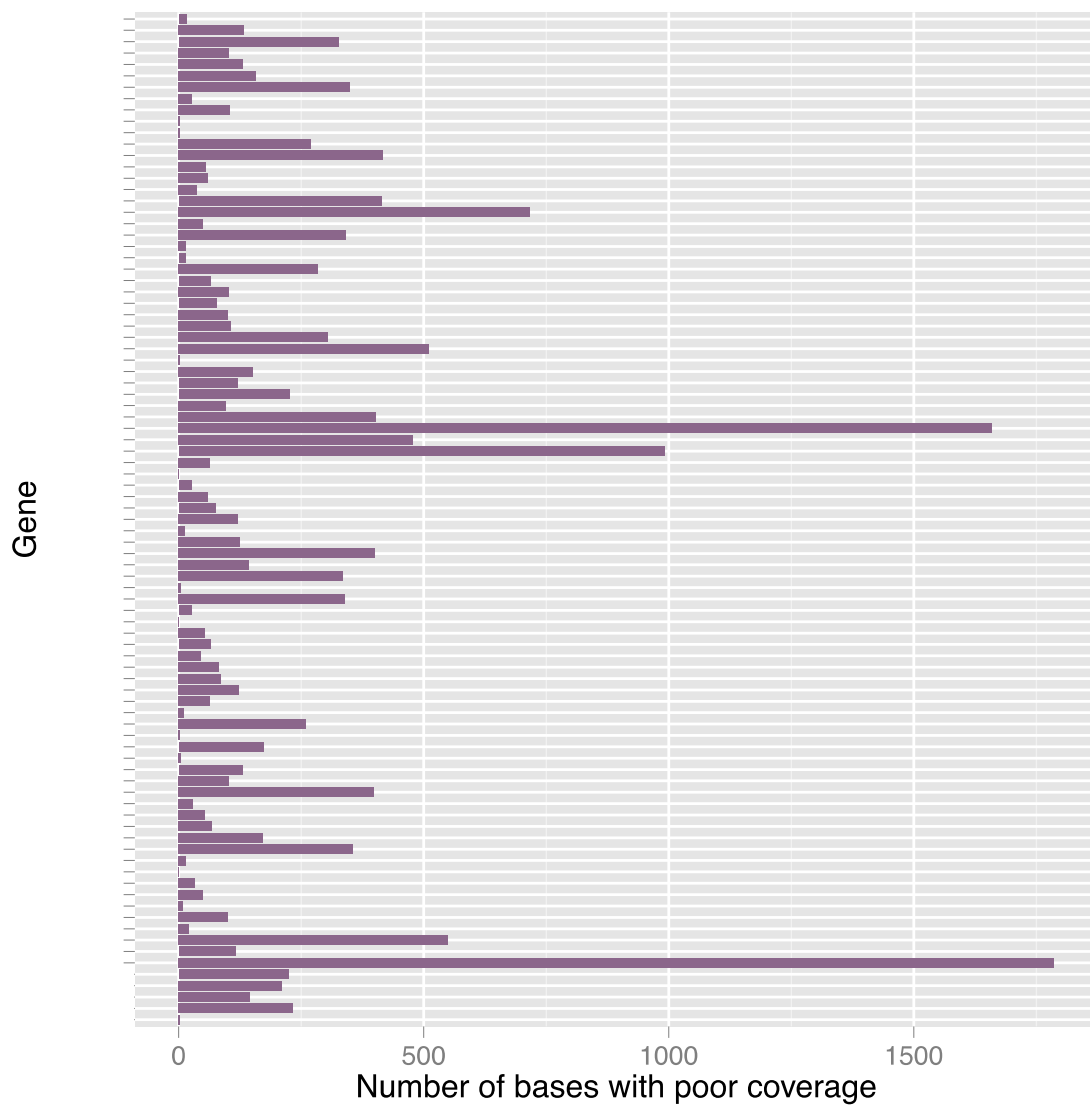

**Supplemental Figure 4:** Estimates of Cross-Contamination Among Samples using ContEst

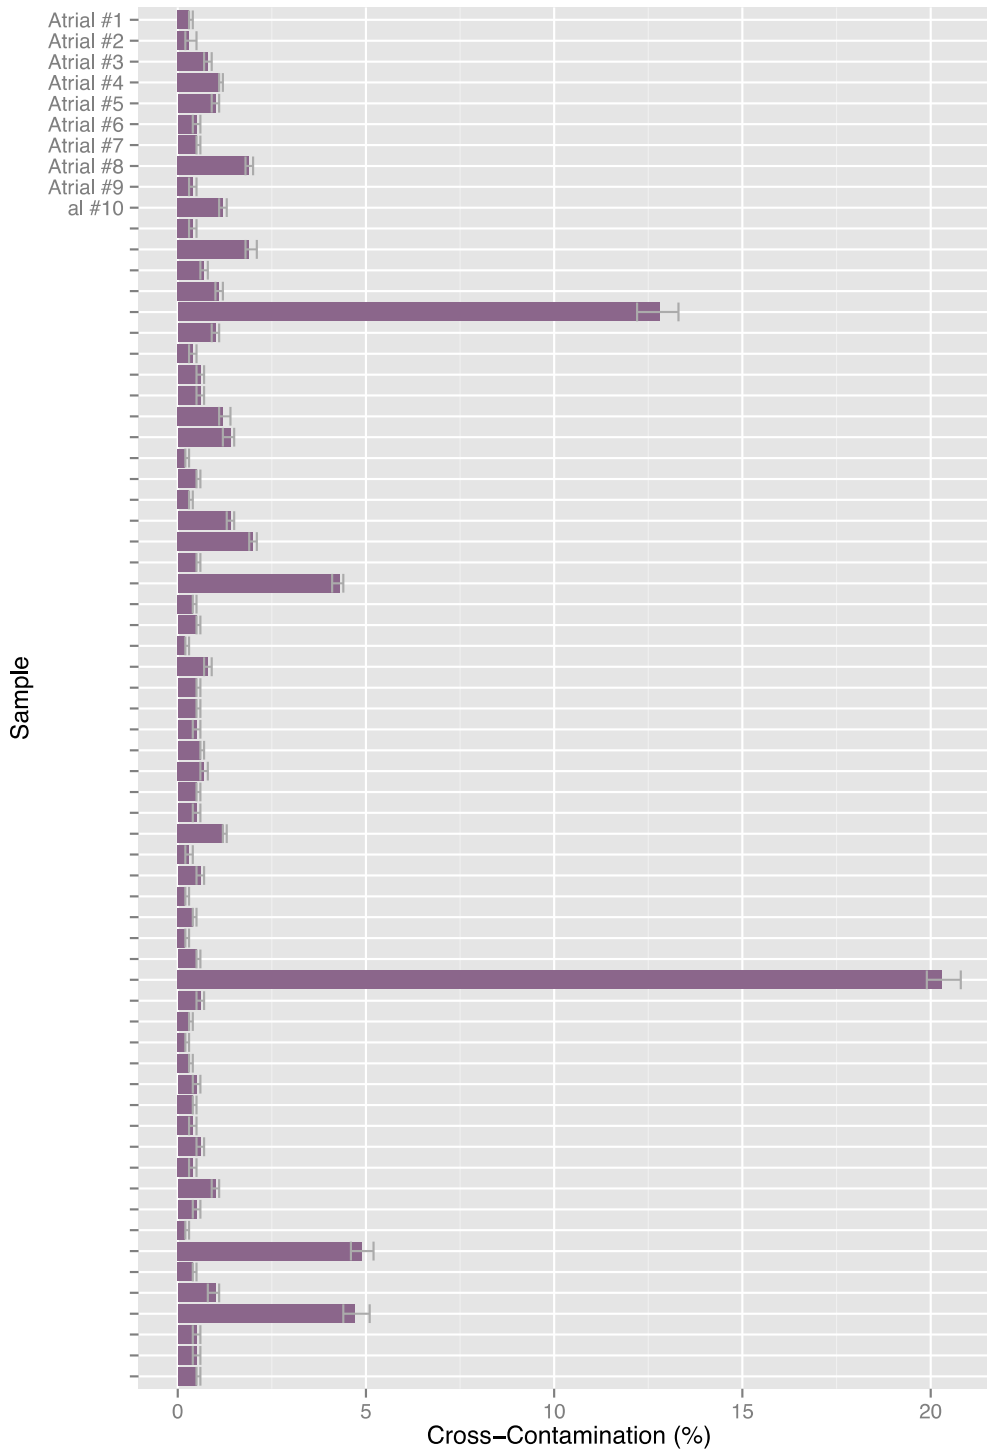

**Supplemental Figure 5:** Discordant Variants Calls with an Anticipated Overwhelming Predominance of G>T Transversions Secondary to Oxidative DNA Damage

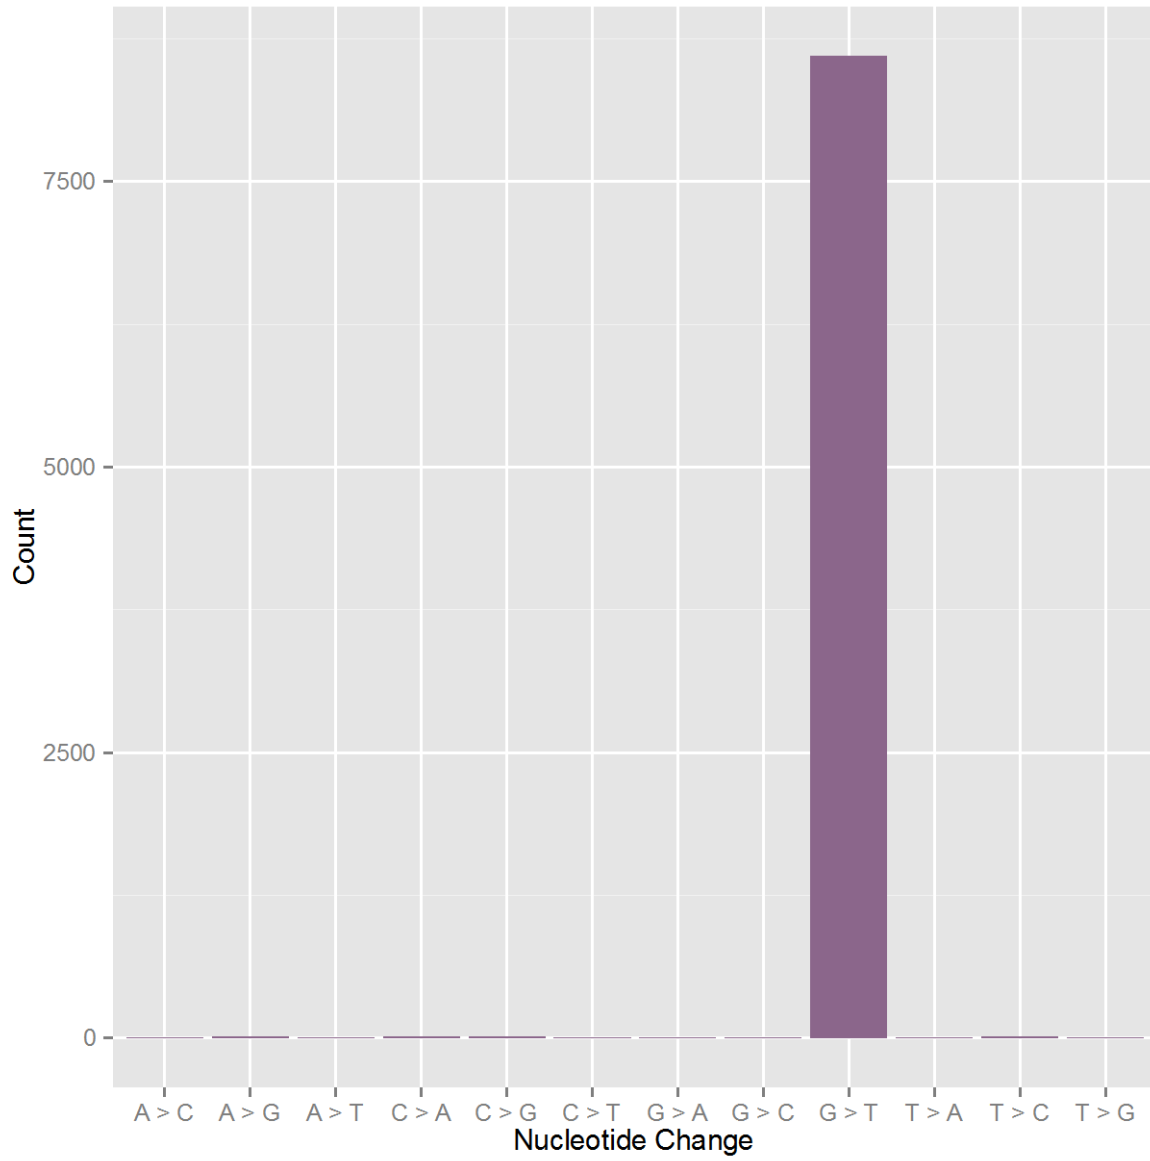

**Supplemental Figure 6:** Correlation of Single Nucleotide Polymorphism Minor Allele Frequencies from our Study Cohort and the 1000 Genomes Project CEU Population.

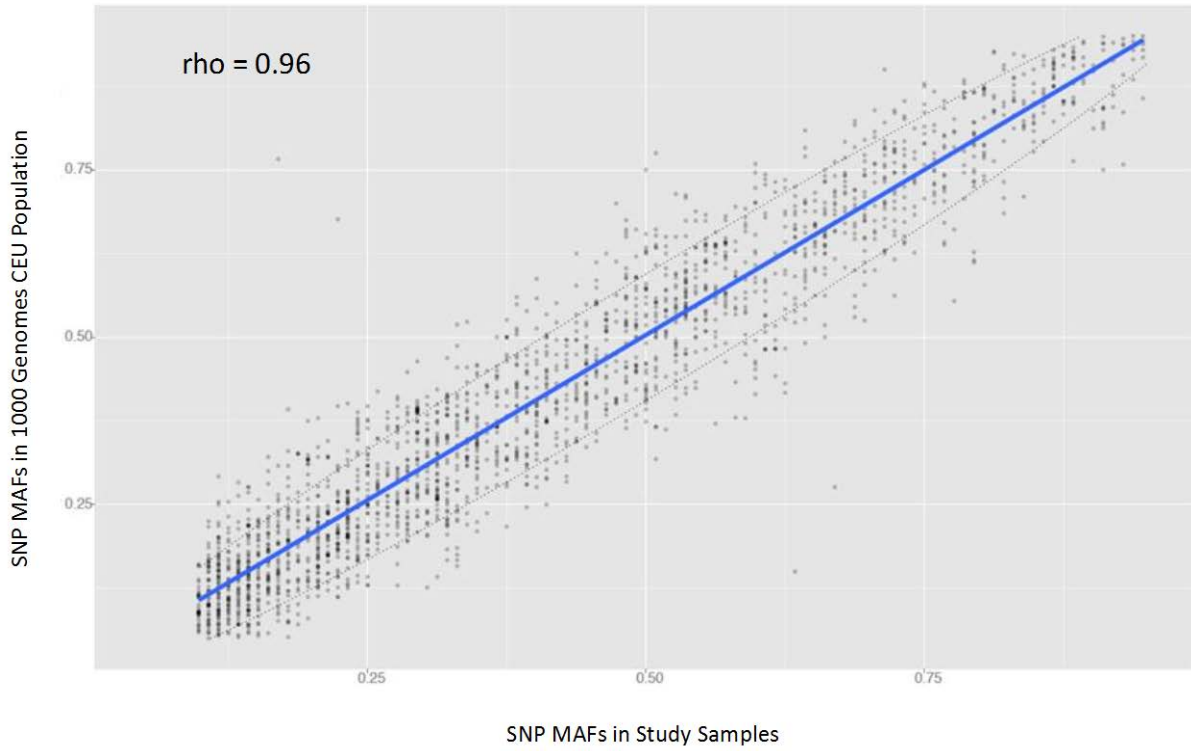

SNP = single nucleotide polymorphism, MAF = minor allele frequency

**Supplemental Figure 7:** Monte Carlo Simulation Probability Estimate for Missed Somatic Mutations Among Filtered G > T Transversions.

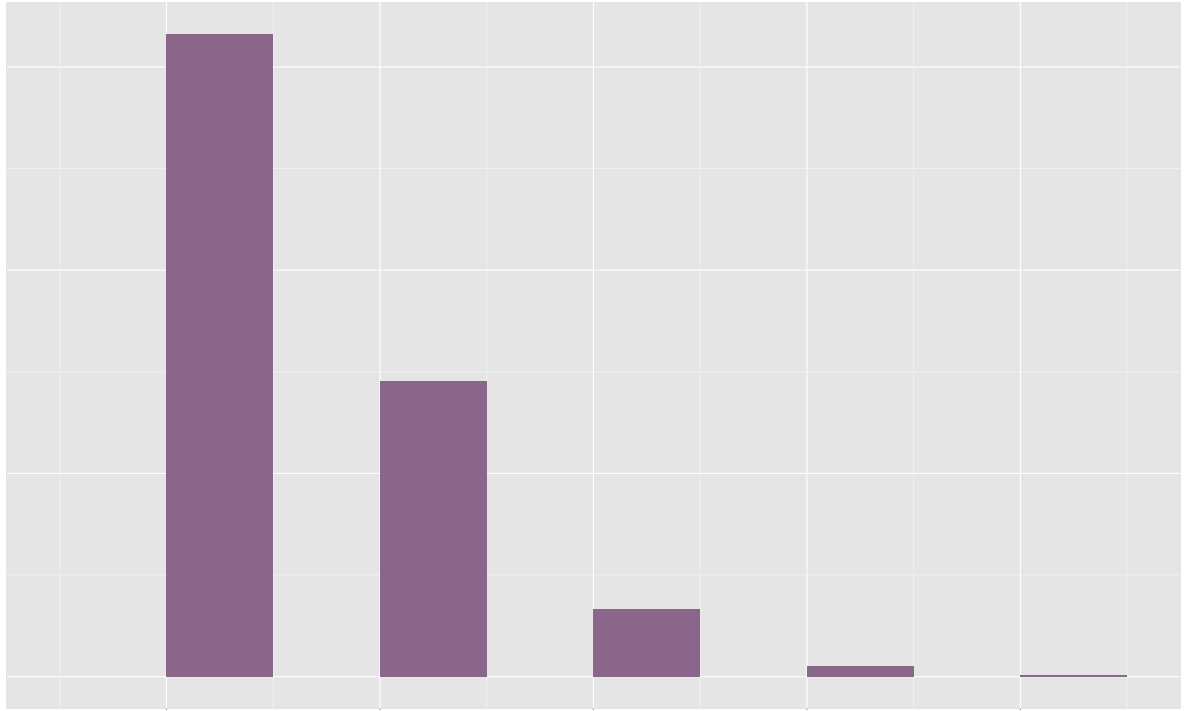



## **Supplemental Table 1: Cardiac Arrhythmia Genetic Panel**

### **Genes Implicated with AF (rare variants)**

*KCNQ1*

*KCNJ2*

*KCNE2*

*KCNE5*

*KCNA5*

*KCNH2*

*GJA5*

*GJA1*

*SCN5A*

*SCN1B*

*SCN1Bb*

*SCN2B*

*SCN3B*

*NPPA*

*ANK2*

*GATA4*

*NUP155*

### **Genes implicated with AF (common variants) - restricted to studies involving >1000 subjects**

*KCNH2*

*GJA1*

*IL6*

### **Loci implicated with AF - restricted to studies involving >1000 subjects**

4q25 - *PITX2*, *ENPEP*

16q22 - *ZFHX3*

1q21 - *KCNN3*, *PMVK*

1q24 - *PRRX1*

7q31 - *CAV1*, *CAV2*

9q22 - *C9orf3*, *FBP1*, *FBP2*

10q22 - *SYNPO2L*, *MYOZ1*

14q23 - *SYNE2*, *ESR2*

15q24 - *HCN4*

12p12 - *SOX5*

6p21 - *CDKN1A*, *PXT1*

3p22 - *SCN10A*, *SCN11A*

5q34 - *NKX2-5*

12q24 - *TBX5*

1q21 - *IL6R*

**Other Genes Implicated with Primary Arrhythmic Disorders That Are Not Ion Channels**

**Long QT Syndrome**

*CAV3*

*AKAP9*

*SNTA1*

**Brugada Syndrome**

*GPD1L*

*MOG1*

*SLMAP*

**CPVT**

*CALM1*

**Idiopathic Ventricular Fibrillation**

*DPP6*

**Autonomic**

**Adrenergic Receptors**

*ADRA1D*

*ADRA1B*

*ADRA1A*

*ADRA2A*

*ADRA2B*

*ADRA2C*

*ADRB1*

*ADRB2*

*ADRB3*

**Inflammation/Fibrosis**

*TGFBR1*

*TGFBR2*

*TGFBR3*

*PDGFA*

*PDGFB*

*PDGFC*

*PDGFD*

*PDGFRA*

*PDGFRB*

*CRP*  
*TNF*  
*NFKB1*  
*NFKB2*  
*IFNG*  
*CTGF*

**RAAS Genes**

*ACE*  
*ACE2*  
*ACE3*  
*REN*  
*AGT*  
*AGTR1*  
*CYP11B2*

**Natriuretic Hormones/Receptors**

*NPPA*  
*NPPB*  
*NPPC*  
*NPR1*  
*NPR2*  
*NPR3*

**MMPs/TIMPs**

*MMP1*  
*MMP2*  
*MMP3*  
*MMP9*  
*MMP13*  
*TIMP1*  
*TIMP2*  
*TIMP3*  
*TIMP4*

**Cardiomyopathies** (DCM = Dilated Cardiomyopathy, HCM = Hypertrophic Cardiomyopathy, RCM = Restrictive Cardiomyopathy, LVNC = Left Ventricular Non-Compaction, Mito = Mitochondrial Myopathy, ARVC = Arrhythmogenic Right Ventricular Cardiomyopathy)

**Cardiomyopathies**

|       |     |
|-------|-----|
| BAG3  | DCM |
| RBM20 | DCM |

|              |                  |
|--------------|------------------|
| RBM24        | DCM              |
| <i>MYH7</i>  | DCM,HCM,RCM,LVNC |
| <i>TNNT2</i> | DCM,HCM,RCM      |
| TPM1         | DCM,HCM          |
| MYBPC3       | DCM,HCM          |
| <i>MYL3</i>  | HCM              |
| <i>MYL2</i>  | HCM              |
| PSEN1        | DCM              |
| <i>PSEN2</i> | DCM              |
| <i>MYOZ2</i> | HCM              |
| <i>TNNI3</i> | DCM,HCM,RCM      |
| <i>ACTC1</i> | DCM,HCM,LVNC     |
| <i>TTN</i>   | DCM,HCM          |
| <i>TNNC1</i> | DCM,HCM          |
| <i>MYH6</i>  | HCM              |
| <i>CSRP3</i> | DCM,HCM          |
| TCAP         | DCM,HCM          |
| VCL          | DCM,HCM          |
| <i>JPH2</i>  | HCM              |
| <i>OBSCN</i> | HCM              |
| <i>DES</i>   | DCM,RCM          |
| <i>LMNA</i>  | DCM              |
| <i>SGCD</i>  | DCM              |
| <i>PLN</i>   | DCM              |
| <i>ACTN2</i> | DCM              |
| LDB3         | DCM,LVNC         |
| <i>CRYAB</i> | DCM,HCM          |
| FHL2         | DCM              |
| ILK          | DCM              |
| LAMA4        | DCM              |
| MYPN         | DCM              |
| DMD          | DCM              |
| EMD          | DCM              |
| TAZ          | DCM,LVNC,Mito    |
| FKTN         | DCM              |
| DSP          | DCM,ARVC         |
| JUP          | DCM,ARVC         |
| PKP2         | ARVC             |
| TMEM43       | ARVC             |
| TGFB3        | ARVC             |
| DSG2         | ARVC             |
| DSC2         | ARVC             |
| DTNA         | LVNC             |

|         |             |
|---------|-------------|
| PRKAG2  | HCM         |
| GLA     | HCM (Fabry) |
| GAA     | HCM (Pompe) |
| LAMP2   | HCM (Danon) |
| AARS2   | Mito        |
| MRPL3   | Mito        |
| SLC25A3 | Mito        |
| SLC25A4 | Mito        |
| COX15   | Mito        |
| SCO2    | Mito        |
| AGK     | Mito        |
| NDUFS2  | Mito        |
| NDUFAF1 | Mito        |
| TMEM70  | Mito        |
| FLNC    | DCM         |
| SVIL    | DCM         |
| HSPB7   | DCM         |
| HSPB2   | DCM         |
| HSPB8   | DCM         |
| HSPB6   | DCM         |
| LMOD2   | DCM         |
| TMOD1   | DCM         |
| TRIM63  | HCM         |
| XIRP1   | DCM         |
| HRC     | DCM         |
| MYOM1   | DCM         |
| CMYA5   | DCM         |
| ACTA1   | HCM         |
| EYA4    | DCM         |

**Sodium Channel Genes**

*NALCN*  
*SCN10A*  
*SCN11A*  
*SCN1A*  
*SCN1B*  
*SCN2A*  
*SCN2B*  
*SCN3A*  
*SCN3B*  
*SCN4A*  
*SCN4B*  
*SCN5A*  
*SCN7A*

*SCN8A*  
*SCN9A*  
*SCNN1A*  
*SCNN1B*  
*SCNN1D*  
*SCNN1G*

**Potassium Channel Genes**

*ABCC8*  
*ABCC9*  
*KCNA1*  
*KCNA10*  
*KCNA2*  
*KCNA3*  
*KCNA4*  
*KCNA5*  
*KCNA6*  
*KCNA7*  
*KCNAB1*  
*KCNAB2*  
*KCNAB3*  
*KCNB1*  
*KCNB2*  
*KCNC1*  
*KCNC2*  
*KCNC3*  
*KCNC4*  
*KCND1*  
*KCND2*  
*KCND3*  
*KCNE1*  
*KCNE2*  
*KCNE3*  
*KCNE4*  
*KCNE5*  
*KCNF1*  
*KCNG1*  
*KCNG2*  
*KCNG3*  
*KCNG4*  
*KCNH1*  
*KCNH2*  
*KCNH3*

*KCNH4*  
*KCNH5*  
*KCNH6*  
*KCNH7*  
*KCNH8*  
*KCNIP1*  
*KCNIP2*  
*KCNIP3*  
*KCNIP4*  
*KCNJ1*  
*KCNJ10*  
*KCNJ11*  
*KCNJ12*  
*KCNJ13*  
*KCNJ14*  
*KCNJ15*  
*KCNJ16*  
*KCNJ18*  
*KCNJ2*  
*KCNJ3*  
*KCNJ4*  
*KCNJ5*  
*KCNJ6*  
*KCNJ8*  
*KCNJ9*  
*KCNK1*  
*KCNK10*  
*KCNK12*  
*KCNK13*  
*KCNK15*  
*KCNK16*  
*KCNK17*  
*KCNK18*  
*KCNK2*  
*KCNK3*  
*KCNK4*  
*KCNK5*  
*KCNK6*  
*KCNK7*  
*KCNK9*  
*KCNMA1*  
*KCNMB1*  
*KCNMB2*

*KCNMB3*  
*KCNMB4*  
*KCNN1*  
*KCNN2*  
*KCNN3*  
*KCNN4*  
*KCNQ1*  
*KCNQ2*  
*KCNQ3*  
*KCNQ4*  
*KCNQ5*  
*KCNS1*  
*KCNS2*  
*KCNS3*  
*KCNT1*  
*KCNT2*  
*KCNU1*  
*KCNV1*  
*KCNV2*

**Calcium Channel Genes**

*ATP2A1*  
*ATP2A2*  
*ATP2A3*  
*ATP2B1*  
*ATP2B2*  
*ATP2B3*  
*ATP2B4*  
*ATP2C1*  
*CACFD1*  
*CACNA1A*  
*CACNA1B*  
*CACNA1C*  
*CACNA1D*  
*CACNA1E*  
*CACNA1F*  
*CACNA1G*  
*CACNA1H*  
*CACNA1I*  
*CACNA1S*  
*CACNA2D1*  
*CACNA2D2*  
*CACNA2D3*



*CACNA2D4*  
*CACNB1*  
*CACNB2*  
*CACNB2b*  
*CACNB3*  
*CACNB4*  
*CACNG1*  
*CACNG2*  
*CACNG3*  
*CACNG4*  
*CACNG5*  
*CACNG6*  
*CACNG7*  
*CACNG8*  
*CALHM1*  
*CATSPER1*  
*CATSPER2*  
*CATSPER3*  
*CATSPER4*  
*CATSPERB*  
*CATSPERD*  
*CATSPERG*  
*ITPR1*  
*ITPR2*  
*ITPR3*  
*MCU*  
*ORAI1*  
*ORAI2*  
*ORAI3*  
*PKD1*  
*PKD1L2*  
*PKD1L3*  
*PKD2*  
*PKD2L1*  
*PKD2L2*  
*TPCN1*  
*TPCN2*

**Acid Sensing Ion Channel Genes**

*ASIC1*  
*ASIC2*  
*ASIC3*  
*ASIC4*

*ASIC5*

**Ion Exchanger Genes**

*SLC11A2*

*SLC17A3*

*SLC24A2*

*SLC26A7*

*SLC26A8*

*SLC26A9*

*SLC30A1*

*SLC35F1*

*SLC4A11*

*SLC4A7*

*SLC8A1*

*SLC8A3*

*SLC9A1*

*SLC9C2*

**Ammonium Ion Transporting Genes**

*RHAG*

*RHCG*

**Transient Receptor Potential Cation Channel Genes**

*MCOLN1*

*MCOLN2*

*MCOLN3*

*TRPA1*

*TRPC1*

*TRPC3*

*TRPC4*

*TRPC5*

*TRPC6*

*TRPC7*

*TRPM1*

*TRPM2*

*TRPM3*

*TRPM4*

*TRPM5*

*TRPM6*

*TRPM7*

*TRPM8*

*TRPV1*

*TRPV2*

*TRPV3*  
*TRPV4*  
*TRPV5*  
*TRPV6*

**Bestrophin Ion Channel Genes**

*BEST1*  
*BEST2*  
*BEST3*  
*BEST4*

**Cyclic Nucleotide-gated Cation Channel Genes**

*CNGA1*  
*CNGA2*  
*CNGA3*  
*CNGA4*  
*CNGB1*  
*CNGB3*  
*HCN1*  
*HCN2*  
*HCN3*  
*HCN4*

**GABA-gated Ion Channel Genes**

*GABRA1*  
*GABRA2*  
*GABRA3*  
*GABRA4*  
*GABRA5*  
*GABRA6*  
*GABRB1*  
*GABRB2*  
*GABRB3*  
*GABRD*  
*GABRE*  
*GABRG1*  
*GABRG2*  
*GABRG3*  
*GABRP*  
*GABRQ*  
*GABRR1*  
*GABRR2*  
*GABRR3*

*KCTD12*

**Chloride Channel Genes**

*ANO1*

*ANO10*

*ANO2*

*ANO3*

*ANO4*

*ANO5*

*ANO6*

*ANO7*

*ANO8*

*ANO9*

*BSND*

*CACA3P*

*CFTR*

*CLCA1*

*CLCA2*

*CLCA4*

*CLCC1*

*CLCN1*

*CLCN2*

*CLCN3*

*CLCN4*

*CLCN5*

*CLCN6*

*CLCN7*

*CLCNKA*

*CLCNKB*

*CLIC1*

*CLIC2*

*CLIC3*

*CLIC4*

*CLIC5*

*CLIC6*

*CLNS1A*

*TTYH1*

*TTYH2*

*TTYH3*

**Glutamate-gated Ion Channel Genes**

*GRIA1*

*GRIA2*

*GRIA3*  
*GRIA4*  
*GRID1*  
*GRID2*  
*GRIK1*  
*GRIK2*  
*GRIK3*  
*GRIK4*  
*GRIK5*  
*GRIN1*  
*GRIN2A*  
*GRIN2B*  
*GRIN2C*  
*GRIN2D*  
*GRIN3A*  
*GRIN3B*  
*GRINA*

**Gap Junction Ion Channel Genes**

*GJA1*  
*GJA3*  
*GJA4*  
*GJA5*  
*GJC1*  
*GJD3*  
*PANX1*  
*PANX2*  
*PANX3*

**Nicotinic-gated Cholinergic Ion Channel Genes**

*CHRFAM7A*  
*CHRNA1*  
*CHRNA10*  
*CHRNA2*  
*CHRNA3*  
*CHRNA4*  
*CHRNA5*  
*CHRNA6*  
*CHRNA7*  
*CHRNA9*  
*CHRNB1*  
*CHRNB2*  
*CHRNB3*

*CHRNA4*  
*CHRND*  
*CHRNE*  
*CHRNA3*

**FXRD Ion Transport Regulator Genes**

*FXRD1*  
*FXRD2*  
*FXRD3*  
*FXRD4*  
*FXRD5*  
*FXRD6*  
*FXRD7*

**Hydrogen Ion Channel Genes**

*ATP1B1*  
*ATP5A1*  
*ATP5B*  
*ATP5C1*  
*ATP5D*  
*ATP5E*  
*ATP5EP2*  
*ATP5F1*  
*ATP5G1*  
*ATP5G2*  
*ATP5G3*  
*ATP5H*  
*ATP5I*  
*ATP5J*  
*ATP5J2*  
*ATP5L*  
*ATP5L2*  
*ATP5O*  
*ATP5S*  
*ATP6*  
*ATP6V0C*  
*ATP6VOA2*  
*ATP6VOA4*  
*ATP8*  
*HVCN1*  
*TCIRG1*

**Glycine-gated Ion Channel Genes**

*GLRA1*  
*GLRA2*  
*GLRA3*  
*GLRA4*  
*GLRB*

**Golgi pH Regulator Ion Channel Genes**

*GPR89A*  
*GPR89B*

**Mitochondrial Voltage Dependent Anion Channel Genes**

*VDAC1*  
*VDAC2*  
*VDAC3*

**Ryanodine Receptor & Related Genes**

*CASQ1*  
*CASQ2*  
*JPH1*  
*JPH2*  
*JPH3*  
*JPH4*  
*RYR1*  
*RYR2*  
*RYR3*  
*TRDN*  
*ASPH*

**Piezo-type Mechanosensitive Ion Channel Genes**

*PIEZO1*  
*PIEZO2*

**Serotonin-gated Ion Channel Receptor Genes**

*HTR3A*  
*HTR3B*  
*HTR3C*  
*HTR3D*  
*HTR3E*

**Transmembrane Channel-like Genes**

*TMC4*  
*TMC5*

*TMC7*

**Trimeric Intracellular Cation Channel Genes**

*TMEM37*

*TMEM38A*

*TMEM38B*

**Zinc Activated Ligand Gated Ion Channel Genes**

*ZACN*

**Purinergic Receptor Genes**

*P2RX1*

*P2RX2*

*P2RX3*

*P2RX4*

*P2RX5*

*P2RX6*

*P2RX7*

**Other Calcium Genes**

*CALM2*

*CALM3*

*CAMK2D*

**Phosphodiesterase Genes**

*PDE4A*

*PDE4B*

*PDE4C*

*PDE4D*

**Other**

*NOS1AP* (QT-interval)
